# 1 Direct Coupling Analysis of Epistasis in Allosteric Materials

2 Barbara Bravi<sup>a,1</sup>, Riccardo Ravasio<sup>a</sup>, Carolina Brito<sup>b</sup>, and Matthieu Wyart<sup>a,1</sup>

3 <sup>a</sup>*Institute of Physics, École Polytechnique Fédérale de Lausanne, CH-1015 Lausanne,*  
4 *Switzerland*

5 <sup>b</sup>*Instituto de Física, Universidade Federal do Rio Grande do Sul, CP 15051, 91501-970*  
6 *Porto Alegre RS, Brazil*

7 <sup>1</sup>To whom correspondence should be addressed. E-mail: barbarabravi@ymail.com, matthieu.wyart@epfl.ch

## 8 **Abstract**

9 In allosteric proteins, the binding of a ligand modifies function at a distant active site. Such al-  
10 losteric pathways can be used as target for drug design, generating considerable interest in inferring  
11 them from sequence alignment data. Currently, different methods lead to conflicting results, in par-  
12 ticular on the existence of long-range evolutionary couplings between distant amino-acids mediating  
13 allostery. Here we propose a resolution of this conundrum, by studying epistasis and its inference in  
14 models where an allosteric material is evolved *in silico* to perform a mechanical task. We find four  
15 types of epistasis (Synergistic, Sign, Antagonistic, Saturation), which can be both short or long-range  
16 and have a simple mechanical interpretation. We perform a Direct Coupling Analysis (DCA) and  
17 find that DCA predicts well mutation costs but is a rather poor generative model. Strikingly, it can  
18 predict short-range epistasis but fails to capture long-range epistasis, in agreement with empirical  
19 findings. We propose that such failure is generic when function requires subparts to work in concert.  
20 We illustrate this idea with a simple model, which suggests that other methods may be better suited  
21 to capture long-range effects.

### Author summary

Allostery in proteins is the property of highly specific responses to ligand binding at a distant site. To inform protocols of *de novo* drug design, it is fundamental to understand the impact of mutations on allosteric regulation and whether it can be predicted from evolutionary correlations. In this work we consider allosteric architectures artificially evolved to optimize the cooperativity of binding at allosteric and active site. We first characterize the emergent pattern of epistasis as well as the underlying mechanical phenomena, finding four types of epistasis (Synergistic, Sign, Antagonistic, Saturation), which can be both short or long-range. The numerical evolution of these allosteric architectures allows us to benchmark Direct Coupling Analysis, a method which relies on co-evolution in sequence data to infer direct evolutionary couplings, in connection to allostery. We show that Direct Coupling Analysis predicts quantitatively mutation costs but underestimates strong long-range epistasis. We provide an argument, based on a simplified model, illustrating the reasons for this discrepancy and we propose neural networks as more promising tool to measure epistasis.

## Introduction

Allosteric regulation in proteins allows for the control of functional activity by ligand binding at a distal allosteric site [1] and its detection could guide drug design [2, 3]. Yet, understanding the principles responsible for allostery remains a challenge. How random mutations dysregulate allosteric communication is a valuable information studied experimentally [4] and computationally [5]. Several analyses have highlighted the non-additivity of mutational effects or *epistasis*. This “interaction” between mutations can span long-range positional combinations [6], results in either beneficial or detrimental effects to fitness [7], and shapes protein evolutionary paths [8]. Given the combinatorial complexity of its characterization, empirical patterns of epistasis are still rather elusive [9–12]. Concomitantly, progress in sequencing has led to an unprecedented increase of availability of data arranged into Multiple Sequence Alignments (MSAs) [13] containing many realizations of the same protein in related species. Different methods have been developed to extract information from sequence variability, e.g. Statistical Coupling Analysis [14, 15] was applied to allostery detection in proteins. It was argued that the allosteric pathway was encoded in spatially extended and connected *sectors*, groups of strongly co-evolving amino-acids, supporting that long-range information on the allosteric pathway is contained in the MSA. Another approach, Direct Couplings Analysis (DCA) [16], aims at inferring evolutionary couplings between amino-acids. Direct couplings predict successfully residue contacts [16] so to inform the discovery of new folds [17], allow one to describe evolutionary fitness landscapes [18, 19] and correlate with epistasis [20, 21]. In the context of allostery, there is no statistical evidence for the existence of long-range direct couplings that would reveal allosteric channels [22], in apparent contradiction with the existence of extended sectors reported in [15] and the observation of long-range epistasis [6].

In this work we propose a solution for this discrepancy, by benchmarking DCA in models of protein

allostery where a material evolves *in silico* to achieve an “allosteric” task [23–29]. We consider recent models incorporating elasticity [24–27, 29], in which long-range co-evolution [26], elongated sectors [26] and long-range epistasis [29] are present and can be interpreted in terms of the propagation of an elastic signal [29]. We focus on materials evolved to optimize cooperative binding over large distances [27], and find four types of epistasis (Synergistic, Sign, Antagonistic, Saturation) that exist over a wide spatial range. We perform DCA and find that it predicts well mutation costs but is a rather poor generative model. Strikingly, it can predict short-range epistasis but fails to capture long-range one, in agreement with empirical findings [22]. We illustrate why it may be so via a simple model, which suggests that neural networks are better suited than DCA to capture long-range effects.

## Model for the evolution of allostery

We follow the scheme of [26, 27] where a protein is described by an elastic network of size  $L$  made of harmonic springs of unit stiffness (here we consider  $L = 12$ ). Binding events are modeled as imposed displacements either at the “allosteric” or at the “active” site (each consisting of several nodes), as shown in color in Fig. 1A. Such imposed displacements elicit an elastic response in the entire protein and cost some elastic energy, which defines our binding energy (see Sec. 1 in S1 Text). Following [27], the fitness  $\mathcal{F}$  measures the cooperativity of binding between allosteric and active site and is defined as the energy difference  $\mathcal{F} \equiv E^{\mathcal{A}c} - (E^{\mathcal{A}c, \mathcal{A}l} - E^{\mathcal{A}l})$  where  $E^{\mathcal{A}c}$ ,  $E^{\mathcal{A}l}$  and  $E^{\mathcal{A}c, \mathcal{A}l}$  are respectively the elastic energy of binding at the active site only ( $\mathcal{A}c$ ), at the allosteric site only ( $\mathcal{A}l$ ) and at both sites simultaneously ( $\mathcal{A}c, \mathcal{A}l$ ). The fitness can be rewritten approximately as (see Sec. 1 in S1 Text)

$$\mathcal{F} \approx \mathbf{F}^{\mathcal{A}c} \cdot \mathbf{R}^{\mathcal{A}l \rightarrow \mathcal{A}c} \quad (1)$$

where  $\mathbf{F}^{\mathcal{A}c}$  is the force field imparted by substrate binding on the nodes of the active site, and  $\mathbf{R}^{\mathcal{A}l \rightarrow \mathcal{A}c}$  is the displacement field induced at the active site by ligand binding. Note that each field in Eq. 1 is of dimension  $n_0 d$ , where  $n_0 = 4$  is the number of nodes in the active site and  $d = 2$  the spatial dimension.

Such networks are evolved by changing the position of springs according to a Metropolis-Monte Carlo routine to maximize  $\mathcal{F}$ . At each step, the fitness difference with respect to the previous configuration  $\Delta\mathcal{F}$  is computed and the new configuration is accepted with a probability  $p = \min(1, \exp \beta \Delta\mathcal{F})$ .  $\beta$  is an evolution inverse temperature controlling the selection pressure for high fitness  $\mathcal{F}$ , we choose  $\beta = 10^4$ . We sample every 1000 time steps after an initial equilibration time of  $10^5$  steps. At long times one obtains a cooperative system of typical  $\mathcal{F} \sim 0.2$ , whose architecture depends on the spatial dimension and boundary conditions [27]. Here we consider a network in  $d = 2$  dimensions with periodic boundaries, equivalent to a cylindrical geometry, where the response to binding evolves towards a *shear* mode. With our scheme we can generate thousands of networks with a similar design. A sequence  $\sigma$  of 0 and 1, where  $\sigma_i = 1$  stands for the presence of a spring at link  $i$  and  $\sigma_i = 0$  for its absence, can be associated to any network, leading to a Multiple Sequence Alignment (MSA) of networks performing the same function

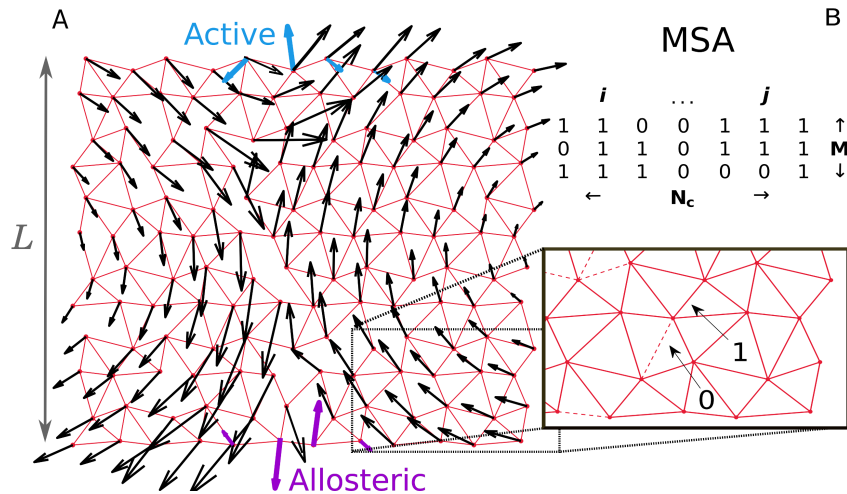

Figure 1: **Study of co-evolution in artificial allosteric networks.** A: Example of an elastic network made of harmonic springs (red) evolved *in silico* to maximize the cooperativity between the allosteric site (purple) and the active site (blue). The response to binding at the allosteric site is indicated by black arrows, and is found to follow a shear motion. B: Each network corresponds to a sequence of 0 and 1 coding for the spring absence or presence. Our scheme allows us to generate a large number  $M$  of such sequences, each corresponding to a slightly different shear architecture.

78 (see Fig. 1B).

## 79 Results

### 80 Nature and classification of epistasis

The cost of a single mutation (i.e. changing the occupancy) at some link  $i$  is defined as  $\Delta\mathcal{F}_i = \mathcal{F} - \mathcal{F}_i$  where  $\mathcal{F}$  is the original fitness and  $\mathcal{F}_i$  the one of the network after the mutation. We denote by  $\Delta\mathcal{F}_{ij} = \mathcal{F} - \mathcal{F}_{ij}$  the cost of a double mutation at  $i$  and  $j$ . Epistasis between loci  $i$  and  $j$  is then defined as  $\Delta\Delta\mathcal{F}_{ij} \equiv \Delta\mathcal{F}_{ij} - \Delta\mathcal{F}_i - \Delta\mathcal{F}_j$ . Following Eq. 1 and observing that a mutation mostly affects the propagation of the signal  $\mathbf{R}^{Al \rightarrow Ac}$  and not how binding locally generates force (see Sec. 1 in S1 Text), epistasis follows approximately

$$\Delta\Delta\mathcal{F}_{ij} \approx -\mathbf{F}^{Ac} \cdot \left( \delta\mathbf{R}_{ij}^{Al \rightarrow Ac} - \delta\mathbf{R}_i^{Al \rightarrow Ac} - \delta\mathbf{R}_j^{Al \rightarrow Ac} \right)$$

81 where  $\delta\mathbf{R}_i^{Al \rightarrow Ac} = \mathbf{R}_i^{Al \rightarrow Ac} - \mathbf{R}^{Al \rightarrow Ac}$ , and  $\mathbf{R}_i^{Al \rightarrow Ac}$  is the allosteric response at the active site of the  
 82 protein mutated at link  $i$ .  $\delta\mathbf{R}_j^{Al \rightarrow Ac}$  and  $\delta\mathbf{R}_{ij}^{Al \rightarrow Ac}$  follow analogous definitions. We denote by  $\theta$  the  
 83 angle between  $\delta\mathbf{R}_i^{Al \rightarrow Ac}$  and  $\delta\mathbf{R}_j^{Al \rightarrow Ac}$ . Assuming that the cost of a double mutation is dominated by  
 84 the strongest point mutation, i.e.  $\Delta\mathcal{F}_{ij} \approx \max(\Delta\mathcal{F}_i, \Delta\mathcal{F}_j)$  leads to

$$\Delta\Delta\mathcal{F}_{ij} \approx -\min(\Delta\mathcal{F}_i, \Delta\mathcal{F}_j). \quad (2)$$

85 This assumption does capture a significant part of epistasis, especially when it is strong, as shown  
86 in Fig. 2A. This observation suggests to classify pairs of loci in terms of their epistasis and the minimal  
87 associated mutation cost  $\min(\Delta\mathcal{F}_i, \Delta\mathcal{F}_j)$  as performed in Fig. 2A.

88 *Saturation:* We define (somewhat arbitrarily) mutations with  $\Delta\mathcal{F} > 0.1$  as lethal. Pairs of such lethal  
89 mutations (which represent  $\sim 0.1\%$  of all pairs, a sparsity in line with experimental findings [21]) have  
90 the strongest epistasis in absolute value, and follow closely Eq. 2, as visible in Fig. 2A. Physically, these  
91 mutations essentially shut down signal propagation by themselves with  $\mathbf{R}_i^{Al \rightarrow Ac} \approx \mathbf{R}_j^{Al \rightarrow Ac} \approx 0$ , in such  
92 a way that the double mutation has the effect of a single one with  $\mathbf{R}_{ij}^{Al \rightarrow Ac} \approx 0$ . This view is confirmed  
93 in Fig. 2B by the observation that  $\cos(\theta) \approx 1$ , as follows from  $\delta\mathbf{R}_i^{Al \rightarrow Ac} \approx \delta\mathbf{R}_j^{Al \rightarrow Ac} \approx -\mathbf{R}^{Al \rightarrow Ac}$ .  
94 Saturation is then a form of very high “diminishing-returns” epistasis, for which evidence from data and  
95 support from theoretical models are accumulating [30, 31].

96 *Antagonistic.* Further up along the diagonal of Eq. 2 in Fig. 2A, this saturation effect becomes milder.  
97 It is more akin to “antagonistic” epistasis [7, 32], whereby, after a first mutation, making a second one  
98 results only in a weak additional change.

99 *Sign.* In the intermediate range of negative-sign epistasis, more compensatory epistatic interactions  
100 can take place, where the fitness cost of a deleterious mutation is diminished by the second mutation  
101 (i.e.  $\Delta\mathcal{F}_{ij} < \max(\Delta\mathcal{F}_i, \Delta\mathcal{F}_j)$ ). Thus some mutations can become beneficial (i.e. increase the fitness) in  
102 presence of another mutation, and this resembles the “sign” epistasis empirically detected [7, 33]. Geomet-  
103 rically, it corresponds to situations where the two mutations deform the signal in opposite directions, so  
104 the second one can partially re-establish fitness. In support of this, Fig. 2B shows that for sign epistasis  
105  $\cos(\theta)$  tends to be negative.

106 *Synergistic.* Positive-sign values indicate “synergistic” epistasis. It occurs if two mutations perturb  
107 the elastic signal in the same direction, causing more damage than expected if they were purely additive.  
108 As clear from Fig. 2B,  $\cos(\theta)$  tends to be positive in this case.

## 109 Direct Coupling Analysis

110 We evolve numerically  $M$  configurations maximizing cooperativity  $\mathcal{F}$ , each yielding a realization of a  
111 (variable) shear design. We sample a configuration for every initial condition to avoid introducing a  
112 bias in the sampling due to their high similarity. We find that the average Hamming distance among  
113 the obtained sequences is  $\sim 20\%$  of their length. Our set of sequences is analogous to a protein MSA  
114 – importantly, in this analogy the role of an amino-acid is played by a link, which can be stiff ( $\sigma_i = 1$ )  
115 or not ( $\sigma_i = 0$ , no springs). In practice we take  $M = 135000$ , much larger than the sequence length  
116  $N_c = (3L^2 - 2L) = 408$ .

117 Next, for a statistical analysis of these sequences, we use DCA, which is based on the idea of fitting  
118 the observed single-site  $\langle\sigma_i\rangle = 1/M \sum_m \sigma_i^m$  and pairwise  $\langle\sigma_i\sigma_j\rangle = 1/M \sum_m \sigma_i^m \sigma_j^m$  frequencies of links  
119 by the probability distribution  $P(\boldsymbol{\sigma})$  with maximal entropy (as this ensures the least biased fit of data  
120 under such empirical constraints). In our setup this approach leads to

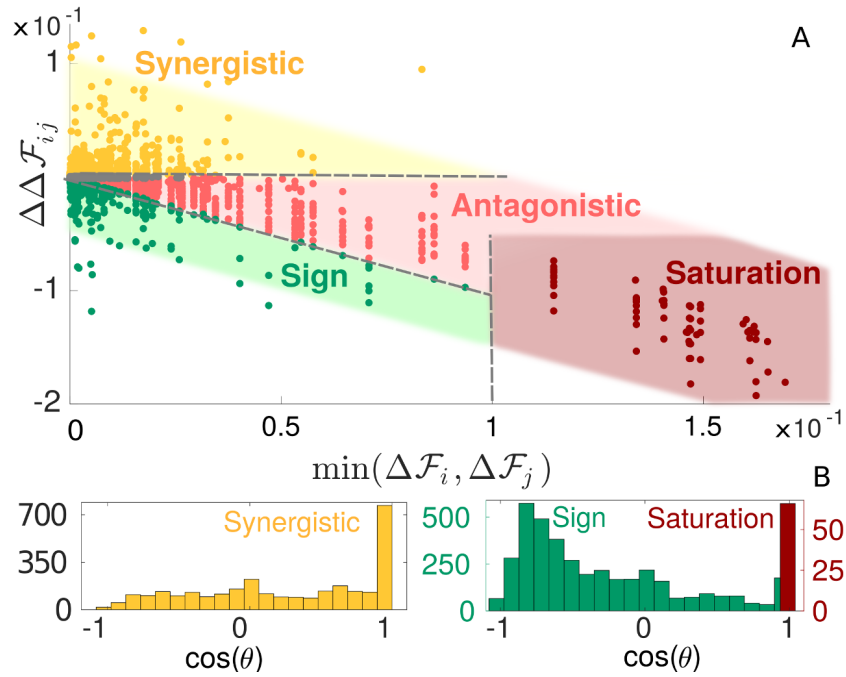

**Figure 2: Classification and mechanical characterization of epistasis in our model of allosteric cooperativity.** A: Phase diagram of epistasis in our allosteric material. All quantities are averages over 50 configurations obtained in a single run. The shaded area is taken with arbitrary width and a -1 slope as a guide to the eye. We show the lines  $\Delta\mathcal{F}_{ij} = 0$ , which divides synergistic from antagonistic/sign epistasis,  $\Delta\mathcal{F}_{ij} = \max(\Delta\mathcal{F}_i, \Delta\mathcal{F}_j)$ , separating sign and antagonistic epistasis, and  $\min(\Delta\mathcal{F}_i, \Delta\mathcal{F}_j) = 0.1$ , the threshold set to distinguish lethal mutations. Points in grey correspond to epistasis  $< 5 \times 10^{-4}$  and are excluded from our analysis. B: Histograms of  $\cos(\theta)$  for synergistic, sign and saturation epistasis.

$$P(\boldsymbol{\sigma}) = \frac{1}{Z} \exp(-\mathcal{E}(\boldsymbol{\sigma})) \quad (3)$$

$$\mathcal{E}(\boldsymbol{\sigma}) = -\sum_{i<j} J_{ij} \sigma_i \sigma_j - \sum_i h_i \sigma_i \quad (4)$$

121 which is equivalent to an Ising model where  $\sigma_i = 0, 1$  would denote the two states (down, up) of  
122 spins. In this setting,  $\mathcal{E}$  is an estimation of  $\beta\mathcal{F}$ ,  $\beta$  being the inverse evolution temperature. In all the  
123 comparisons (e.g. Fig. 3) we omit  $\beta$  as we are interested in the proportionality between  $\mathcal{E}$  and  $\mathcal{F}$ . The  
124 “fields”  $h_i$  and “couplings”  $J_{ij}$  are inferred to match  $\langle\sigma_i\rangle$  and  $\langle\sigma_i\sigma_j\rangle$ . The inference of these parameters  
125 can be performed with several algorithms, we focus on ACE (Adaptive Cluster Expansion) [34, 35], an  
126 approximate technique developed from statistical physics ideas, combined with maximum likelihood, an  
127 exact technique. This approach is extremely accurate and we compare it to a method more approximate,  
128 but much faster computationally, as mean field Direct Coupling Analysis (mfDCA) [16], see Methods for  
129 details on the implementation.

130 In this way we can benchmark DCA in the context of allosteric materials and test if it: (i) reproduces  
131 accurately the cost of single mutations; (ii) is a good generative model, i.e. if it can generate new sequences  
132 with high fitness and (iii) can predict epistasis.

### 133 Inferring mutation costs

134 Fig. 3A shows the map of true mutation costs, indicating a large cost near the allosteric and active  
135 sites as well as in the central region where the allosteric response displays high shear (as documented  
136 in [27]). DCA enables one to infer this map by computing the estimated mutation cost  $\Delta\mathcal{E}_i = \mathcal{E}_i - \mathcal{E}$   
137 for a mutation at a generic link  $i$ , Fig. 3B. The comparison is excellent, as evident also from the high  
138 correlation revealed by the scatter plot Fig. 3C. Importantly, including pairwise couplings is key for  
139 inferring mutation costs, as a model based on conservation alone performs poorly, see inset of Fig. 3C.

### 140 Generative power of DCA

141 Once the model of Eqs. 3, 4 is inferred, can it be used to generate new sequences with a high fitness, as  
142 previously shown for models of protein folding [36]? To answer this question, we generate new sequences  
143 by Monte Carlo sampling from the probability distribution Eq. 3. Fig. 4 shows the fitness of the obtained  
144 sequences vs their distance to “consensus” - the consensus being the most representative sequence of the  
145 MSA, i.e. where springs occupy the positions with largest mean occupancy. We find that (i) the variability  
146 of the MSA, quantified by the distance to consensus, is well reproduced (ii) the fitness is much more  
147 variable than for random sequences, with a few sequences that do perform as well as evolved ones (which  
148 never occurs for random sequences) but (iii) the mean obtained fitness is rather low, although larger, in  
149 a statistically significant way, than the one of random configurations (which is zero). As shown in Fig. 4,  
150 these results deteriorate further if a more approximate algorithm as mfDCA is used to infer parameters.  
151 We have checked that the generative performance is not improved by lowering the temperature of the

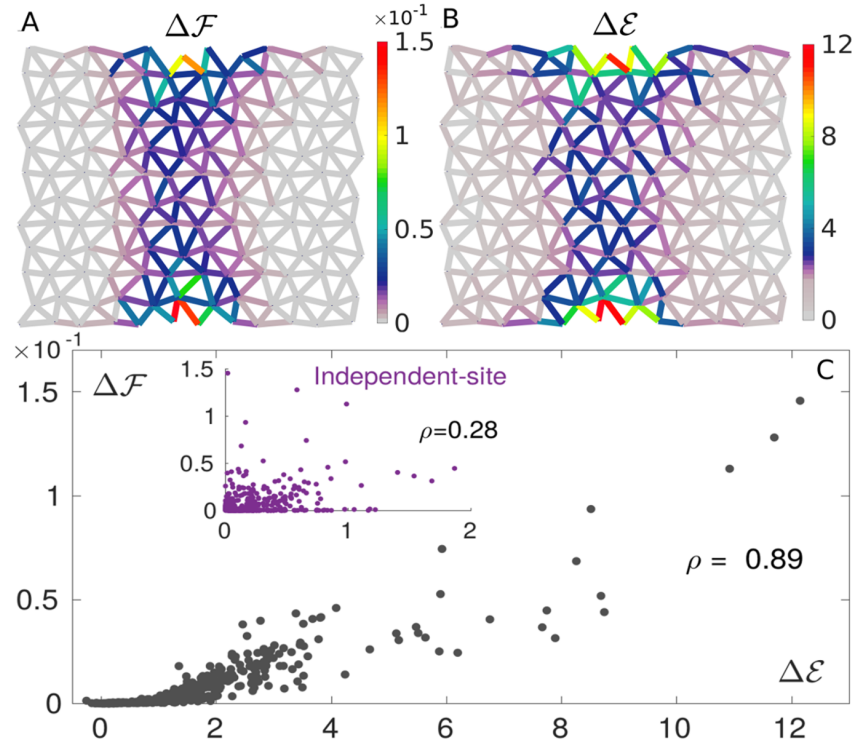

Figure 3: **Prediction of mutation costs by DCA.** Maps of true  $\Delta\mathcal{F}$  (A) and DCA-inferred  $\Delta\mathcal{E}$  (B) single mutation costs, averaged over  $1.5 \times 10^3$  configurations randomly chosen from the MSA. Their patterns are very similar, revealing high costs near the allosteric and active sites and in the shear path connecting them. C: Scatter plot showing the strong correlation between  $\Delta\mathcal{F}$  and  $\Delta\mathcal{E}$  for all links. The estimation of mutation costs based on an independent-site model (i.e. on conservation) correlates poorly with the true cost (inset), proving the need for incorporating correlations for proper prediction of mutation costs.

152 Monte Carlo sampling. Overall, these results suggest that the generative power of DCA is limited in  
 153 the context of allostery, in contrast with results for models of protein folding [36]. Thus an Ising model,  
 154 a quadratic model accounting for conservation and correlations in the MSA (first and second order  
 155 statistics), although it can capture some features of the shear design (e.g. the inhomogeneous distribution  
 156 of coordination, as shown in Fig. S2), is a rather drastic approximation for the initial allosteric fitness.  
 157 Indeed we have tested that higher orders as the third moment are not well reproduced (see Fig. S1). In  
 158 what follows we shall emphasize in particular the failure of DCA to infer long-range epistasis.

### 159 Inferring epistasis with DCA

160 From Eq. 4 one readily has that the DCA prediction for epistasis follows  $\Delta\Delta\mathcal{E}_{ij} = -J_{ij}(2\sigma_i - 1)(2\sigma_j - 1)$ ,  
 161 implying  $|\Delta\Delta\mathcal{E}_{ij}| = |J_{ij}|$ . Hence, within DCA, the epistasis magnitude is simply the one of evolutionary  
 162 couplings. In the inset of Fig. 5A we show the spatial location of the top 400 pairs of links with highest  
 163 coupling magnitude, illustrating that long-range couplings are rare. Yet, as implied jointly by Fig. 2A



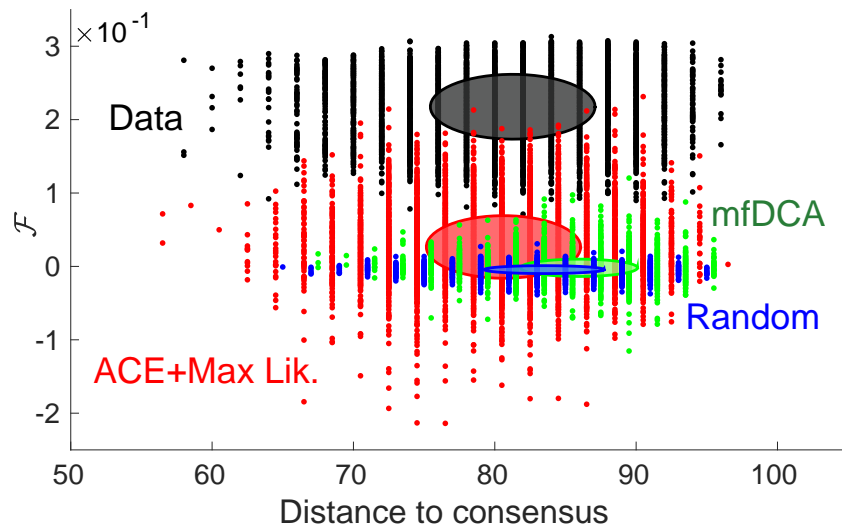

Figure 4: **Generative performance of DCA.** Fitness vs distance to consensus of configurations generated by the inferred model, following the representation of [36]. The sampling is done from  $P(\sigma)$  of Eq. 4 (a Boltzmann-Gibbs probability distribution), whose parameters have been inferred via ACE + maximum likelihood (red cloud) or mfDCA (green cloud). Original high fitness configurations (black cloud) and random ones (blue) are added as a reference. Each cloud consists of  $10^4$  sequences and the drawn ellipse gives one standard deviation around the mean in both horizontal and vertical directions. Distances to consensus of ACE + maximum likelihood, mfDCA and random sequences are shifted by respectively  $+0.7$ ,  $-0.7$  and  $-1.3$  for better visibility.

164 and Fig. 3A, long range epistasis is present in our model, meaning that DCA fails to capture it. This  
165 fact is demonstrated quantitatively in Fig. 5A showing the mean epistasis  $|\Delta\Delta\mathcal{F}_{ij}|$  and mean DCA  
166 prediction  $|\Delta\Delta\mathcal{E}_{ij}|$  as a function of distances. The DCA-predicted trend reproduces the original one at  
167 small distances but strongly underestimates long-range epistasis. This is further evidenced in Fig. 5B  
168 showing that the average fraction of long-range pairs (range  $> 7$ ) with the largest epistasis which falls  
169 in the list of the 400 pairs with largest couplings is much smaller than for short-distance pairs ( $< 7$ ).  
170 However, even at short distance the prediction by  $|J_{ij}|$  is not excellent, but it is remarkably improved if,  
171 as done in [12, 21], one considers epistasis averaged over several configurations (see Sec. 2 in S1 Text).  
172 Our finding is consistent with the lack of empirical evidence for long-range inferred couplings in allosteric  
173 proteins [22].

#### 174 **A proposed explanation for the failure of DCA at long-distances**

175 We propose that the failure of DCA at long-range stems from its inability to describe a function that  
176 requires many subparts of the system to work in concert, when each subpart can be of different type.  
177 For example, in allosteric proteins on short length scales soft regions must exist where shear propagates  
178 [27, 37], giving rise to local constraints. Yet, there is flexibility in the exact location of these soft regions.  
179 On a larger length scale, these regions must assemble to create an extended soft elastic mode [27, 38, 39],

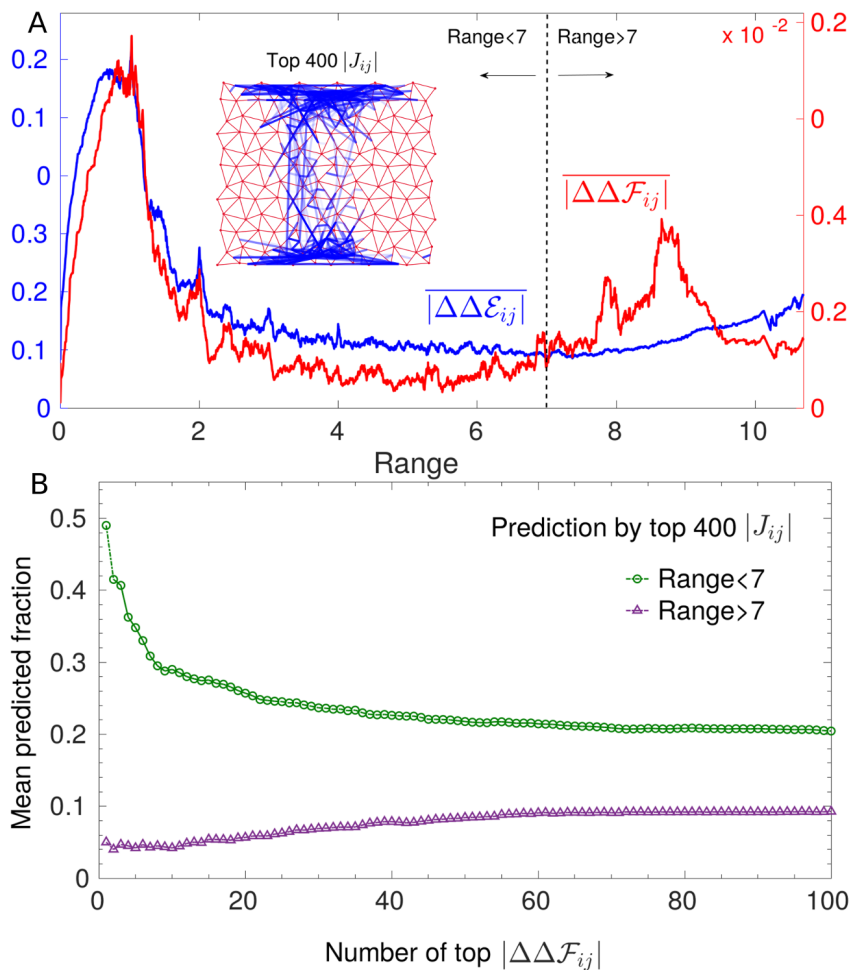

Figure 5: **Prediction of epistasis by DCA.** A: Running average of the absolute value of epistasis  $|\Delta\Delta\mathcal{F}_{ij}|$  and of DCA prediction  $|\Delta\Delta\mathcal{E}_{ij}|$  for  $1.5 \times 10^3$  configurations as a function of the distance between link  $i$  and  $j$ . The trends are nearly identical at short distances but at long distance DCA underestimates epistasis. Inset: Top 400 inferred couplings. They are mostly short range with only a few long-range couplings connecting the allosteric and the active site. Next we assess the prediction of epistasis in single configurations by these top 400 couplings. We consider separately long-range ( $> 7$ ) and short-range ( $< 7$ ) pairs of links, and rank them respectively in terms of the epistasis magnitude  $|\Delta\Delta\mathcal{F}_{ij}|$ . B shows which fraction of these pairs - averaged over 100 configurations randomly chosen - belongs to the 400 largest couplings, as a function of the number of pairs with maximal epistasis considered. Clearly coupling magnitude has less predictive power at large distances than at short ones. This feature stays robust also if we increase, e.g. up to 1000, the number of top couplings for prediction (see Fig. S4A).

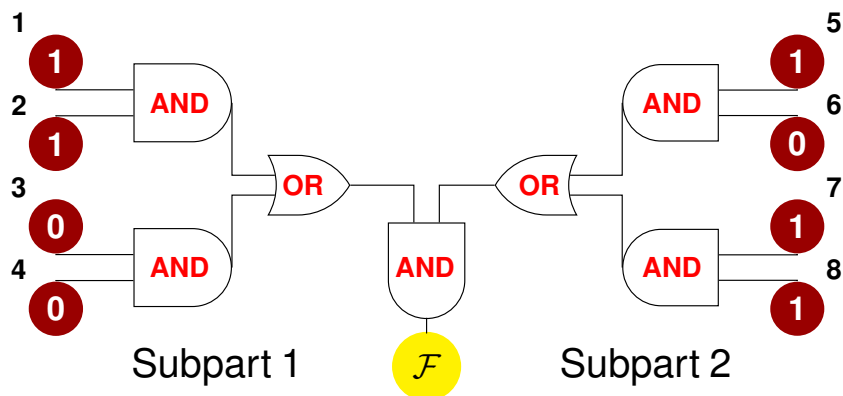

Figure 6: **Sketch of a simple model for protein function.** A system is arranged into 2 subparts which must work jointly to accomplish a given function (AND gate). Each subpart can be of 2 types (OR gate), to work each type must satisfy some constraints (AND gate between single units).

180 which generates global constraints: for the shear architectures it implies the presence of a soft path  
 181 between the allosteric and active site, whose position however can fluctuate. We argue that when  
 182 applied to systems whose function is organized in such a hierarchical way, DCA underestimates long-  
 183 range constraints. To illustrate this point, we introduce a Boolean model, shown in Fig. 6. A generic  
 184 “function” is achieved by two subparts that must work in concert (AND gate) and that can be of two  
 185 different types (OR gate) but each must be functional (AND gate). This model comprises 8 units, taking  
 186 the value 0 or 1, decomposed into 4 groups: 2 groups are the possible types of subpart 1 (left in Fig. 6) and  
 187 the other 2 the possible types of subpart 2 (right). A configuration is “functional” if 2 units of the same  
 188 group are simultaneously in state 1 for each subpart. There are 49 functional configurations, whose fitness  
 189 is fixed to  $\mathcal{F}$ , all other configurations have fitness 0. We assume that  $\mathcal{F}$  is large in such a way that the  
 190 sequences in the MSA are only the 49 functional ones, with a uniform distribution. It is straightforward  
 191 to calculate epistasis in this model, as well as single-site and pairwise frequencies from which couplings  
 192  $J_{ij}$  and fields  $h_i$  can be inferred. In particular we can compare  $|\Delta\Delta\mathcal{F}_{ij}|$  and  $|\Delta\Delta\mathcal{E}_{ij}|$  for units  $i$  and  $j$  either  
 193 in the same group, so locally constrained by function (at “short distance”, e.g.  $i = 1$  and  $j = 2$ ), or in  
 194 the two different subparts, thus globally constrained (at “long distance” e.g.  $i = 1$  and  $j = 5$ ). We obtain  
 195 (see Sec. 2.1 in S1 Text) that  $|\Delta\Delta\mathcal{F}_{12}|/|\Delta\Delta\mathcal{F}_{15}| \approx 2.3$ : global and local constraints lead to relatively  
 196 similar short range and long-range epistasis. Yet we find that epistasis between subparts is noticeably  
 197 underestimated in contrast to epistasis within subparts. To show this, we look at the DCA prediction  
 198 for the ratio of epistasis between two pairs of sites divided by the true ratio of epistasis. For pairs of  
 199 sites belonging to the same subpart, DCA predicts equally well epistasis. For example, considering the  
 200 pair of sites (1,2) and the pair (1,3), one finds  $|\Delta\Delta\mathcal{E}_{13}|/|\Delta\Delta\mathcal{E}_{12}| \times |\Delta\Delta\mathcal{F}_{12}|/|\Delta\Delta\mathcal{F}_{13}| \approx 0.86$  which is  
 201 close to unity. However if sites belong to different subparts, DCA strongly underestimates epistasis with  
 202  $|\Delta\Delta\mathcal{E}_{15}|/|\Delta\Delta\mathcal{E}_{12}| \times |\Delta\Delta\mathcal{F}_{12}|/|\Delta\Delta\mathcal{F}_{15}| \approx 0.33$ .

## 203 Discussion

204 We have benchmarked DCA in a model of protein allostery where a mechanical task must be achieved  
205 over long distances. Such models display a rich pattern of epistasis, which can be both short and long-  
206 range and vary in sign. DCA predicts well mutation costs but is not a good generative model. This  
207 failure echoes with the drastic underestimation of long-range epistasis by the pairwise couplings inferred  
208 by DCA from evolutionary correlations. This finding rationalizes why there is no statistical evidence  
209 for long-range couplings in allosteric proteins analyzed by DCA [22], where long-range epistasis and  
210 functional effects are however found [6, 12, 15].

211 Yet, as we show in S1 Text (see Sec. 2), we expect that DCA can capture some aspects of the long-  
212 range epistasis pattern in allosteric proteins. Indeed, high-cost mutations exhibit stronger epistasis than  
213 low-cost ones (as also seen in RNA sequences [33, 40], in the enzyme TEM-1  $\beta$ -lactamase [11] and in  
214 previous *in silico* evolution work [29]), and are well-predicted by DCA. Testing this DCA prediction for  
215 epistasis patterns empirically could be made possible by the increasing availability of deep mutational  
216 scans [12, 41].

217 Finally, we have provided the more general argument, illustrated by a simple model, that a co-  
218 evolution based maximum-entropy approach as DCA is not the appropriate inference framework when  
219 function requires several, variable parts to work in concert. Can one find better generative models than  
220 DCA for such complex functions? Several ways have been proposed to go beyond pairwise models by  
221 including nonlinearities, which implicitly take into account correlations at all orders, as nonlinear poten-  
222 tials in Restricted Boltzmann Machines [42], maximum-entropy probability measures with a nonlinear  
223 function of the energy [43] or maximum-likelihood inference procedures based on nonlinear functions [44].  
224 As a first test, we have trained a 3-layers feedforward neural network with nonlinear (sigmoid) activation  
225 functions to learn the values of fitness in the simple model of Fig. 6. On the validation set, we could reach  
226 average mean squared errors on the estimated fitness  $\sim 10^{-6} - 10^{-7}$ , hence mutation costs and epistasis  
227 are correctly captured by this method (see Sec. 2.1.1 in S1 Text). This observation raises the possibility  
228 that neural networks may lead to better generative models in proteins, a hypothesis that could also be  
229 benchmarked *in silico*.

230

## 231 Methods

### 232 Direct Coupling Analysis: inference procedure

233 In a maximum-entropy approach, extracting information from MSAs can be cast as an inverse problem,  
234 i.e. inferring the set of parameters which enable the model (an Ising model in our setup) to reproduce  
235 certain observed statistical properties [45, 46]. The exact solution of this problem is found by Maximum  
236 Likelihood algorithms, which search for the set of couplings  $J_{ij}$  and fields  $h_i$  maximizing the likelihood

237 that the model specified by such parameters produced data with the given statistics (single-site and  
238 pairwise frequencies in our case). This exact maximization might often be infeasible, therefore to tackle  
239 the inverse problem approximate techniques have been developed: for instance, we resort to the Adaptive  
240 Cluster Expansion (ACE), an expansion of the entropy (which indeed corresponds to the likelihood)  
241 into contributions from clusters of spins [34, 35, 47]. We use the package made available by Barton  
242 <https://github.com/johnbarton/ACE>. The implementation consists of first a run of ACE followed by  
243 a proper maximum likelihood refinement (QLS routine), which takes as starting set of fields and couplings  
244 the ACE-inferred ones. Different parameters for the ACE and QLS routines can be set by the user, e.g.  
245  $\gamma_2$ , the  $L_2$ -norm regularization strength for couplings which penalizes spurious large absolute values  
246 induced by undersampling and for which a natural value is  $\gamma_2 = 1/M$  ( $M$  being the size of the sample).  
247 To help convergence, we have chosen for ACE a higher value  $\gamma_2 = 10^{-2}$  and  $\theta = 10^{-5}$  (this is the threshold  
248 at which the algorithm will run then exit, see [35]). In the further refinement by QLS, we have set  $mcb$ ,  
249 the number of Monte Carlo steps used to estimate the inference error, to 200000 and  $\gamma_2 = 1/M$ . Having  
250 full control of the numerical evolution, we have tried to avoid undersampling issues by generating a large  
251 number of configurations  $M = 135000$ , which leads to  $\gamma_2 \approx 0.7 \times 10^{-5}$ . For the inference we remove  
252 from sequences the 6 links at the active and allosteric sites as they are always associated to the symbol  
253 1 (always occupied by a spring), so the number of parameters to infer is  $N'_c + N'_c(N'_c - 1)/2 \sim 81000$   
254 with  $N'_c = N_c - 6 = 402$ . We have verified that low values of the  $L_2$ -regularization allow us to obtain the  
255 maximal generative performance compatible with the model (in comparison to higher regularization).  
256 By default the  $L_2$  regularization of fields is  $0.01 \times \gamma_2$ . In Fig. S1A, it is shown that the result of the  
257 inference is a model perfectly able to reproduce the first and second order statistics (as it should by  
258 construction) but that fails at reproducing higher order statistics.

259 For a comparison, we have considered also mean field Direct Coupling Analysis (mfDCA) [16], derived  
260 from a mean-field factorized ansatz for the Boltzmann-Gibbs distribution Eq. 3. Couplings in mfDCA  
261 are given by  $J_{ij} = -(\mathbf{C}^{-1})_{ij}$ , where  $\mathbf{C}_{ij} = \langle \sigma_i \sigma_j \rangle - \langle \sigma_i \rangle \langle \sigma_j \rangle$  is the covariance of the MSA (we recall that  
262 in each sequence  $\sigma_i = 1$  stands for the presence of a spring at link  $i$  and  $\sigma_i = 0$  for its absence). Typically  
263  $\mathbf{C}$  is not invertible due to undersampling, making it necessary to add a pseudocount  $\lambda$  (see [48]). As  
264 shown in [49], a pseudocount also helps correct for the systematic biases introduced by the mean field  
265 approximation: for this reason, we have used a pseudocount  $\lambda$  and chosen its value as  $\lambda = 0.5$ , which  
266 allows the best comparison to the ACE and maximum likelihood results, see Fig. S1B. It is noteworthy  
267 that in this way a computationally cheap technique as mfDCA yields a pattern of top  $J_{ij}$  strikingly  
268 similar to the one of a very accurate inference achieved by the combination of ACE and maximum  
269 likelihood. Therefore mfDCA, while extremely poor as a generative model, exhibits a good performance  
270 at reconstructing the distribution of relevant couplings, as shown in Fig. S1C.

## 271 Mutation costs and generative performance in the inferred Ising model

272 Costs of double mutations, i.e. joint mutations affecting links  $i$  and  $j$ , can be computed in the original  
273 model via fitness changes  $\Delta\mathcal{F}_{ij} = \mathcal{F} - \mathcal{F}_{ij}$ , where  $\mathcal{F}_{ij}$  is the fitness after springs in  $i$  and  $j$  have been  
274 mutated. A double mutation can correspond either to (i) adding two springs at links  $i$  and  $j$  (i.e.  
275  $\sigma_i = \sigma_j = 1$ ) or removing them (i.e.  $\sigma_i = \sigma_j = 0$ ) or to (ii) moving a spring from link  $i$  to link  $j$  or  
276 viceversa (i.e.  $\sigma_i = 0, \sigma_j = 1$  or  $\sigma_i = 1, \sigma_j = 0$ ). Let us call the former “non-swap” mutations and the  
277 latter “swap” mutations. Swap mutations conserve the total amount of springs (360), thus the overall  
278 average coordination  $\langle z \rangle = 5$ , and are the ones performed in the *in silico* evolution. As optimal allosteric  
279 configurations maximize fitness with respect to this type of mutations, we stick to them also when we  
280 compare mutation costs in terms of fitness and inferred energy (see Fig. 3C): we define “effective” single  
281 mutation costs  $\Delta\mathcal{F}_i$  and  $\Delta\mathcal{E}_i$  by taking, for each link, the swap with a link in the external region (more  
282 rigid, as visible in e.g. Fig. S2), where mutations are completely neutral, thus whose cost would be  
283 roughly zero.

284 For the generative step, we implement a Monte Carlo sampling which relocates springs from an  
285 occupied to an unoccupied link, i.e. which follows swap-type dynamics as for the original numerical  
286 evolution. This allows us to select, from the inferred model, sequences that are structurally as close  
287 as possible to the initial data, i.e. with the same average coordination  $\langle z \rangle = 5$ , to make a consistent  
288 comparison with them. We have verified that even relaxing this constraint in the sampling leads to  
289 sequences endowed with higher internal variability yet lying in the same range on fitness (hence the  
290 inferred model incorporates rather well the information on the fixed amount of springs). The parameters  
291 of the Ising model are inferred in such a way as to match single-site occupancy, which reflects the spatial  
292 pattern of coordination in the allosteric networks. In Fig. S2 we show that generated sequences, despite  
293 having lower fitness, reproduce successfully this property as they should.

## 294 Comparison with conservation

295 Single-site frequency in protein alignments, informative about local conservation, is a standard measure  
296 of mutation costs at a certain position [50] and can be fit by an independent-site Ising model. Energy (Eq.  
297 4) in this case contains only field terms and, once these are inferred from link occupancies  $\langle \sigma_i \rangle$ , one can  
298 compute energy changes  $\Delta\mathcal{E}_i$  upon point mutations. The energy cost of a mutation in an independent-  
299 site model is then  $\Delta\mathcal{E}_i = (2\sigma_i - 1)h_i$ , where  $h_i = \log(\langle \sigma_i \rangle(1 - \bar{\sigma})/\bar{\sigma}(1 - \langle \sigma_i \rangle))$  describes how the observed  
300 occupancy of a link  $i$ ,  $\langle \sigma_i \rangle$ , is biased away from the average occupancy  $\bar{\sigma} = 360/408 = 0.88$ . In average  
301  $\Delta\mathcal{E}_i$  gives also a measure of *conservation* of link  $i$  as it is 0 when  $\langle \sigma_i \rangle = \bar{\sigma}$  and it increases the more  
302 link  $i$  tends to be either occupied or vacant. The improvement achieved by the pairwise model over this  
303 conservation-based measure of mutation costs is extremely significant (see inset of Fig. 3C). On the one  
304 hand, conservation is a purely local measure - it takes into account how a particular position is crucial to  
305 the propagation of the allosteric response. Including pairwise couplings proves to be crucial to capture  
306 the context-dependence of mutation costs thus for their quantitative prediction. On the other hand, the

307 degree itself of structural conservation is rather low due to the heterogeneity of the shear-design MSA:  
308 the conformation, precise location and size of the shear path, hence the role of each link, can vary from  
309 architecture to architecture, leading to low structural conservation (with peaks only around the active  
310 and allosteric site). Conservation is found much higher *within* one set of dynamically related solutions  
311 (as for Fig. 2A), corresponding to one realization of the shear design among the many included in the  
312 MSA.

### 313 **Acknowledgment:**

314 We acknowledge interesting and stimulating discussions with Eric Aurell, John Barton, Johannes Berg,  
315 Simona Cocco, Paolo de Los Rios, Solange Flatt, Joachim Krug, Michael Lassig, Duccio Malinverni,  
316 Simone Pompei, Remi Monasson, Martin Weigt, Le Yan, Stefano Zamuner. We are particularly grateful  
317 to John Barton, Le Yan, Duccio Malinverni and Stefano Zamuner for help with the codes. M. W. thanks  
318 the Swiss National Science Foundation for support under Grant No. 200021-165509 and the Simons  
319 Foundation Grant (454953 Matthieu Wyart).

## 320 **References**

- 321 1. Jingjing G, Huan-Xiang Z. Protein Allostery and Conformational Dynamics. Chem Rev.  
322 2016;116(11):6503–6515.
- 323 2. Dokholyan NV. Controlling Allosteric Networks in Proteins. Chem Rev. 2016;116(11):6463–6487.
- 324 3. Guarnera E, Berezovsky IN. Allosteric sites: remote control in regulation of protein activity. Curr  
325 Opin Struct Biol. 2016;37:1–8.
- 326 4. Tang Q, Fenton AW. Whole protein alanine-scanning mutagenesis of allostery: A large percentage  
327 of a protein can contribute to mechanism. Human Mutation. 2017;38:1132–1143.
- 328 5. Ahuja LG, Kornev AP, McClendon CL, Veglia G, Taylor SS. Mutation of a kinase allosteric node  
329 uncouples dynamics linked to phosphotransfer. Proc Natl Acad Sci USA. 2017;114(6):E931–E940.
- 330 6. Olson CA, Wu NC, Sun R. A Comprehensive Biophysical Description of Pairwise Epistasis through-  
331 out an Entire Protein Domain. Curr Biol. 2014;24(22):2643–2651.
- 332 7. De Visser JAGM, Cooper TF, Elena SF. The causes of epistasis. Proc R Soc B. 2011;278(1725):3617–  
333 3624.
- 334 8. Starr TN, Thornton JW. Epistasis in protein evolution. Protein Sci. 2016;25:1204–1218.
- 335 9. Ortlund EA, Bridgham JT, Redinbo MR, Thornton JW. Crystal Structure of an Ancient Protein:  
336 Evolution by Conformational Epistasis. Science. 2007;317(5844):1544–1548.

- 337 10. Natarajan C, Inoguchi N, Weber RE, Fago A, Moriyama H, Storz JF. Epistasis Among Adaptive  
338 Mutations in Deer Mouse Hemoglobin. *Science*. 2013;340(6138):1324–1327.
- 339 11. Schenk MF, Szendro IG, Salverda ML, Krug J, de Visser JAGM. Patterns of Epistasis between  
340 Beneficial Mutations in an Antibiotic Resistance Gene. *Mol Biol Evol*. 2013;30(8):1779–1787.
- 341 12. Salinas VH, Ranganathan R. Coevolution-based inference of amino acid interactions underlying  
342 protein function. *eLife*. 2018;7:e34300.
- 343 13. Durbin R, Eddy SR, Krogh A, Mitchison G. *Biological sequence analysis: probabilistic models of*  
344 *proteins and nucleic acids*. Cambridge university press, 1998; 1998.
- 345 14. Süel GM, Lockless SW, Ranganathan R. Evolutionarily conserved networks of residues mediate  
346 allosteric communication in proteins. *Nat Struct Mol Biol*. 2003;10:59–69.
- 347 15. Reynolds KA, McLaughlin RN, Ranganathan R. Hot Spots for Allosteric Regulation on Protein  
348 Surfaces. *Cell*. 2011;147(7):1564–1575.
- 349 16. Morcos F, Pagnani A, Lunt B, Bertolino A, Marks DS, Sander C, et al. Direct-coupling analysis of  
350 residue coevolution captures native contacts across many protein families. *Proc Natl Acad Sci USA*.  
351 2011;108(49):E1293–E1301.
- 352 17. Ovchinnikov S, Park H, Varghese N, Huang P, Pavlopoulos GA, Kamisetty DEK, et al. Protein  
353 Structure Determination using Metagenome sequence data. *Science*. 2017;355(6322):294–298.
- 354 18. Barrat-Charlaix P, Figliuzzi M, Weigt M. Improving landscape inference by integrating heterogeneous  
355 data in the inverse Ising problem. *Scientific Reports*. 2016;6:37812.
- 356 19. Figliuzzi M, Jacquier H, Schug A, Tenailon, Weigt M. Coevolutionary Landscape Inference and the  
357 Context-Dependence of Mutations in Beta-Lactamase TEM-1. *Mol Biol Evol*. 2016;33(1):268–280.
- 358 20. Nelson ED, Grishin NV. Inference of epistatic effects in a key mitochondrial protein. *Phys Rev E*.  
359 2018;97(062404).
- 360 21. Poelwijk FJ, Socolich M, Ranganathan R. Learning the pattern of epistasis linking genotype and  
361 phenotype in a protein. *Bioarxiv* <http://dxdoiorg/101101/213835>. 2017;.
- 362 22. Anishchenko I, Ovchinnikov S, Kamisetty H, Baker D. Origins of coevolution between residues  
363 distant in protein 3D structures. *Proc Natl Acad Sci USA*. 2017;114(34):9122–9127.
- 364 23. Hemery M, Rivoire O. Evolution of sparsity and modularity in a model of protein allostery. *Phys*  
365 *Rev E*. 2015;91(4):042704.
- 366 24. Rocks JW, Pashine N, Bischofberger I, Goodrich CP, Liu AJ, Nagel SR. Designing allostery-inspired  
367 response in mechanical networks. *Proc Natl Acad Sci USA*. 2017;114(10):2520–2525.



- 368 25. Flechsig H. Design of elastic networks with evolutionary optimised long-range communication as  
369 mechanical models of allosteric proteins. *Biophys J.* 2017;113(3):558–571.
- 370 26. Yan L, Ravasio R, Brito C, Wyart M. Architecture and coevolution of allosteric materials. *Proc Natl*  
371 *Acad Sci USA.* 2017;114(10):2526–2531.
- 372 27. Yan L, Ravasio R, Brito C, Wyart M. Principles for optimal cooperativity in allosteric materials.  
373 *Biophys J.* 2018;114(12):2787–2798.
- 374 28. Tlusty T, Libchaber A, Eckmann JP. Physical model of the sequence-to-function map of proteins.  
375 *Phys Rev X.* 2017;7(021037).
- 376 29. Dutta S, Eckmann JP, Libchaber A, Tlusty T. Green function of correlated genes in a minimal  
377 mechanical model of protein evolution. *Proc Natl Acad Sci USA.* 2018;.
- 378 30. Chou HH, Chiu HC, Delaney NF, Segrè D, Marx CJ. Diminishing Returns Epistasis Among Beneficial  
379 Mutations Decelerates Adaptation. *Science.* 2011;332(6034):1190–1192.
- 380 31. Schoustra S, Hwang S, Krug J, de Visser JAGM. Diminishing-returns epistasis among random  
381 beneficial mutations in a multicellular fungus. *Proc R Soc B.* 2016;283:20161376.
- 382 32. Desai MM, Weissman D, Feldman MW. Evolution Can Favor Antagonistic Epistasis. *Genetics.*  
383 2007;177:1001–1010.
- 384 33. Lalić J, Elena SF. Magnitude and sign epistasis among deleterious mutations in a positive-sense  
385 plant RNA virus. *Heredity.* 2012;109(2):71–77.
- 386 34. Cocco S, Monasson R. Adaptive Cluster Expansion for Inferring Boltzmann Machines with Noisy  
387 Data. *Phys Rev Lett.* 2011 Mar;106:090601.
- 388 35. Cocco S, Monasson R. Adaptive cluster expansion for the inverse Ising problem: convergence,  
389 algorithm and tests. *J Stat Phys.* 2012;147:252–314.
- 390 36. Jacquin H, Gilson A, Shakhnovich E, Cocco S, Monasson M. Benchmarking Inverse Statistical  
391 Approaches for Protein Structure and Design with Exactly Solvable Models. *PLoS Comput Biol.*  
392 2016;12(5):e1004889.
- 393 37. Mitchell MR, Tlusty T, Leibler S. Strain analysis of protein structures and low dimensionality of  
394 mechanical allosteric couplings. *Proc Natl Acad Sci USA.* 2016;113(40):5847–5855.
- 395 38. De Los Rios P, Cecconi F, Pretre A, Dietler G, Michielin O, Piazza F, et al. Functional dynamics of  
396 PDZ binding domains: a normal-mode analysis. *Biophys J.* 2005;89(1):14–21.
- 397 39. Zheng W, Brooks BR, Thirumalai D. Low-frequency normal modes that describe allosteric tran-  
398 sitions in biological nanomachines are robust to sequence variations. *Proc Natl Acad Sci USA.*  
399 2006;103(20):7664–7669.

- 400 40. Wilke CO, Christoph A. Interaction between directional epistasis and average mutational effects.  
401 Proc R Soc B. 2001;268(1475):1469–1474.
- 402 41. Fowler DM, Fields S. Deep mutational scanning: a new style of protein science. Nat Methods.  
403 2014;11(801):801–807.
- 404 42. Tubiana J, Cocco S, Monasson R. Learning protein constitutive motifs from sequence data.  
405 arXiv:180308718. 2018;.
- 406 43. Humplik J, Tkačik G. Probabilistic models for neural populations that naturally capture global  
407 coupling and criticality. PLoS Comput Biol. 2017;13(9):e1005763.
- 408 44. Otwinowski J, McCandlish DM, Plotkin JB. Inferring the shape of global epistasis. Proc Natl Acad  
409 Sci USA. 2018;115:E7550–E7558.
- 410 45. Nguyen R H C R Zecchina, Berg J. Inverse statistical problems: from the inverse Ising problem to  
411 data science. Adv Phys. 2017;66(3):1–65.
- 412 46. Bachschmid-Romano L, Oppen M. A statistical physics approach to learning curves for the inverse  
413 Ising problem. J Stat Mech Theory Exp. 2017;2017(6):063406.
- 414 47. Barton JP, De Leonardis E, Coucke A, Cocco S. ACE: adaptive cluster expansion for maximum  
415 entropy graphical model inference. Bioinformatics. 2016;32(20):3089–3097.
- 416 48. Cocco S, Feinauer C, Figliuzzi M, Monasson R, Weigt M. Inverse statistical physics of protein  
417 sequences: a key issues review. Rep Prog Phys. 2018;81(3):032601.
- 418 49. Barton JP, Cocco S, De Leonardis E, Monasson R. Large pseudocounts and  $L_2$ -norm penalties are  
419 necessary for the mean-field inference of Ising and Potts models. Phys Rev E. 2014;90:012132.
- 420 50. Kumar P, Henikoff S, Ng PC. Predicting the effects of coding non-synonymous variants on protein  
421 function using the SIFT algorithm. Nat Protoc. 2009;4:1073.

422 Supplementary Information S1 Text:

423 Direct Coupling Analysis of Epistasis in Allosteric Materials

424 Barbara Bravi<sup>1</sup>, Riccardo Ravasio<sup>1</sup>, Carolina Brito<sup>2</sup>, Matthieu Wyart<sup>1</sup>

425 <sup>1</sup> *Institute of Physics, École Polytechnique Fédérale de Lausanne, CH-1015 Lausanne, Switzerland*

426 <sup>2</sup> *Instituto de Física, Universidade Federal do Rio Grande do Sul, CP 15051, 91501-970 Porto Alegre*

427 *RS, Brazil*

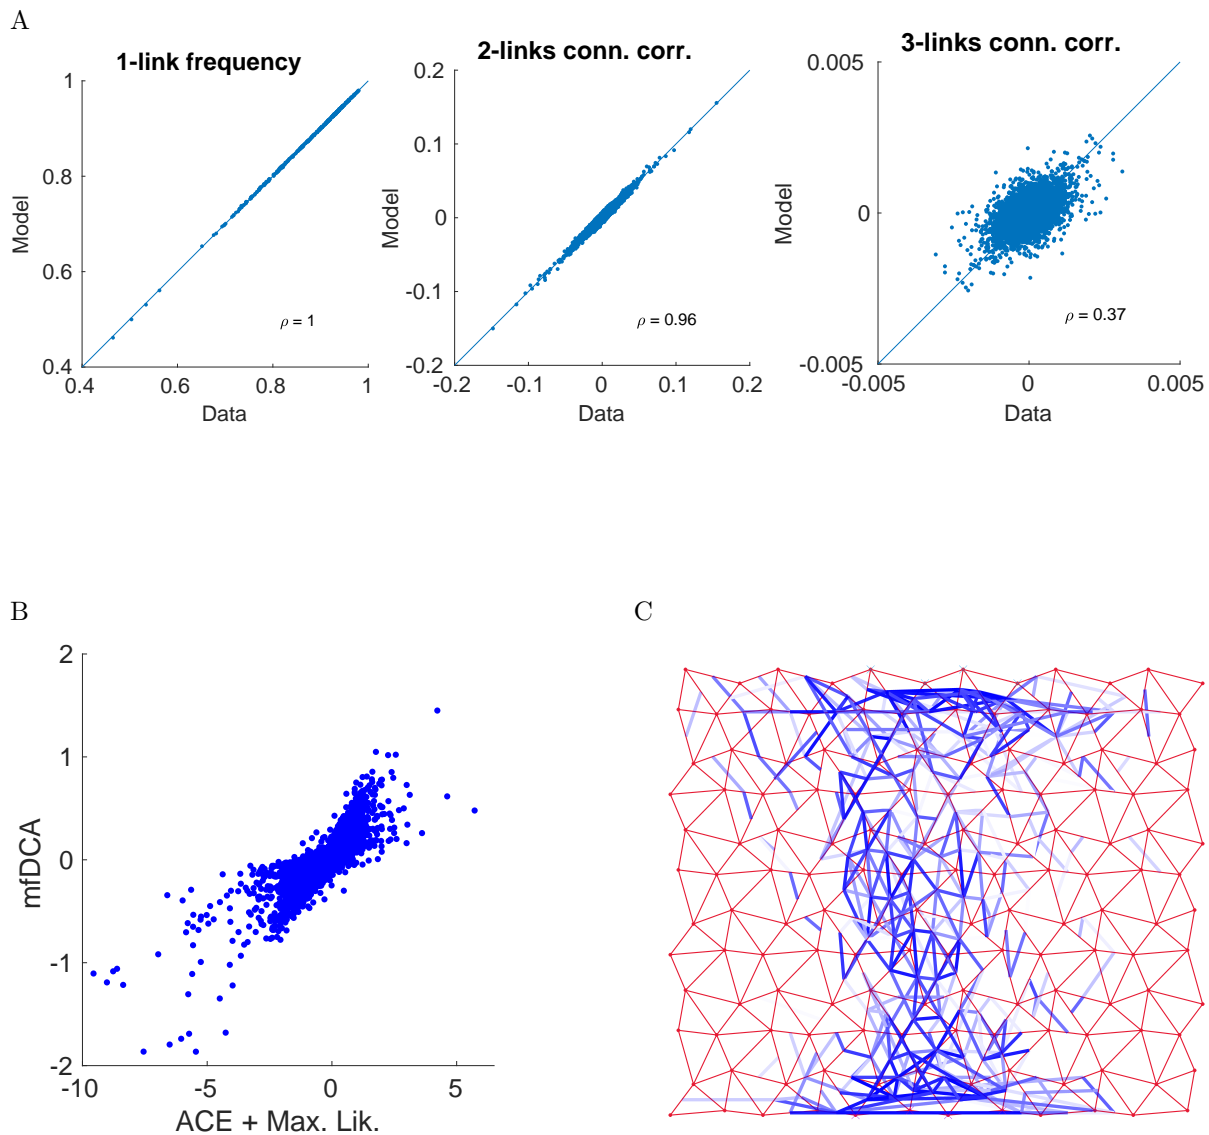

Figure S1: **Performance of the inference procedure.** A: Statistics of the model inferred by combining ACE and Maximum Likelihood. 1-link frequency and 2-links connected correlations are very accurately reproduced, as they should by construction (the relative errors, defined as in [1], are respectively  $\epsilon_m = 2.45 \times 10^{-1}$  and  $\epsilon_C = 1.30 \times 10^{-1}$ ). In contrast the third order connected correlations, which are not constrained in the inference, are not well captured (Pearson coefficient  $\rho = 0.37$ ). This is a hint that the Ising model - a pairwise probabilistic model over  $\sigma_i$  - is an approximation which becomes poor for estimating higher order moments. B: Scatter plot comparing  $J_{ij}$  inferred via mfDCA to the direct couplings of ACE + Max. Lik.: the pseudocount in mfDCA has been set to  $\lambda = 0.5$  in such a way as to obtain the highest correlation between the two. C: Spatial distribution of top 400 mfDCA-inferred couplings on the network. The reconstruction of the topology of relevant couplings is rather robust with respect to the choice of more approximate inference methods as mfDCA. As in Fig. 5A (inset) of the main text, they are concentrated at short range, i.e. they connect links lying close either to the active site or the allosteric site and in the central high-shear path. Long range mfDCA couplings, connecting links around respectively allosteric and active site, are weaker and appear among the top 600-1000 ones, implying an even worse performance at predicting long range epistasis than ACE + Max. Lik.

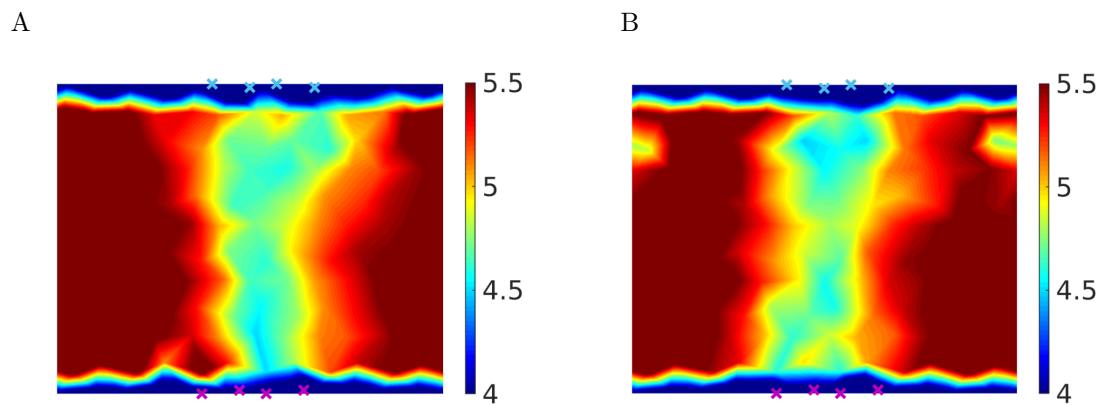

Figure S2: **Properties of generated allosteric sequences.** Coordination map of original sequences (A) and generated ones (B). They both exhibit a softer (i.e. with coordination  $z < 5$ ) central path joining active and allosteric sites (indicated respectively by blue and purple crosses) along which the shear-like sliding takes place. This path is embedded in a more connected, “rigid” region where the coordination  $z > 5$ . Solutions sampled from the inferred energy landscape have a design but are not maximally fit, showing that more “structural” components, as the distribution of links, are captured but additional information would be needed to reproduce a complex mechanical function as the cooperative fitness.

## 428 1 Mechanical interpretation of mutation costs and epistasis

429 Let us denote by  $\epsilon$  the set of nodes where ligand binding takes place, e.g. for ligand binding at the  
 430 allosteric site  $\epsilon = (\mathcal{A}l)$  with size  $\dim(\epsilon) = n_0$ . Such event imposes a displacement  $\mathbf{R}^\epsilon$  on the nodes  
 431  $\epsilon$  which imparts locally a force  $\mathbf{F}^\epsilon$  and induces a response  $\mathbf{R}^{\epsilon \rightarrow r}$  on all the other nodes  $r$ . Clearly  
 432  $\dim(\epsilon) + \dim(r) = L^d$  where  $L^d$  is the total number of nodes for a network of size  $L$  in  $d$  dimensions;  
 433 for the example of binding to the allosteric site  $r = (\mathcal{A}c, b)$ , where  $b$  stands for the “bulk” of nodes not  
 434 belonging neither to the allosteric nor to the active site. (In this paper we consider networks as in Fig.  
 435 1A of the main text, with  $d = 2$ ,  $L = 12$  and  $n_0 = 4$  for both active and allosteric site). The relation  
 436 between force and overall response field is written in terms of the dynamical matrix  $\mathcal{M}$

$$\begin{pmatrix} \mathbf{F}^\epsilon \\ \mathbb{0} \end{pmatrix} = \mathcal{M} \begin{pmatrix} \mathbf{R}^\epsilon \\ \mathbf{R}^{\epsilon \rightarrow r} \end{pmatrix} \quad (5)$$

437 hence  $\mathcal{M}$  is endowed with a block structure as follows

$$\mathcal{M} = \begin{pmatrix} \mathcal{M}^{\epsilon, \epsilon} & \mathcal{M}^{\epsilon, r} \\ (\mathcal{M}^{\epsilon, r})^T & \mathcal{M}^{r, r} \end{pmatrix}$$

438 Forces as well as responses can be calculated solely from the imposed displacement by introducing a  
 439 matrix  $\mathcal{Q}$

$$\mathcal{Q} = \begin{pmatrix} \mathbb{1}^\epsilon & -\mathcal{M}^{\epsilon, r} \\ \mathbb{0} & -\mathcal{M}^{r, r} \end{pmatrix}$$

440 such that

$$\begin{pmatrix} \mathbf{F}^\epsilon \\ \mathbf{R}^r \end{pmatrix} = \mathcal{Q}^{-1} \mathcal{M} \begin{pmatrix} \mathbf{R}^{\epsilon \rightarrow r} \\ \mathbb{0} \end{pmatrix} \quad (6)$$

441 Binding at  $\epsilon$  costs an elastic energy  $E^\epsilon$

$$E^\epsilon = \frac{1}{2} \mathbf{F}^\epsilon \cdot \mathbf{R}^\epsilon \quad (7)$$

442 and the cooperative fitness is specified by a combination of such elastic energies

$$\mathcal{F} = E^{\mathcal{A}c} - (E^{\mathcal{A}c, \mathcal{A}l} - E^{\mathcal{A}l}) \quad (8)$$

443 where  $E^{\mathcal{A}c}$ ,  $E^{\mathcal{A}c, \mathcal{A}l}$  and  $E^{\mathcal{A}l}$  are given by Eq. 7 with  $\epsilon = (\mathcal{A}c)$ ,  $\epsilon = (\mathcal{A}c, \mathcal{A}l)$  and  $\epsilon = (\mathcal{A}l)$  respectively.  
 444 Maximal cooperativity corresponds to making binding of a substrate at the active site energetically  
 445 favored when already a ligand is bound to the allosteric site, as this reduces its binding energy from  
 446  $E^{\mathcal{A}c}$  to  $(E^{\mathcal{A}c, \mathcal{A}l} - E^{\mathcal{A}l})$ . One can express the energy of joint binding at the allosteric and active site  
 447  $E^{\mathcal{A}c, \mathcal{A}l} = \frac{1}{2} \mathbf{F}^{\mathcal{A}c, \mathcal{A}l} \cdot \mathbf{R}^{\mathcal{A}c, \mathcal{A}l}$  as

$$\frac{1}{2} \mathbf{F}^{\mathcal{A}c, \mathcal{A}l} \cdot \mathbf{R}^{\mathcal{A}c, \mathcal{A}l} = \frac{1}{2} \mathbf{F}^{\mathcal{A}l} \cdot \mathbf{R}^{\mathcal{A}l} + \frac{1}{2} \mathbf{F}_{|\mathcal{A}l}^{\mathcal{A}c} \cdot (\mathbf{R}^{\mathcal{A}c} - \mathbf{R}^{\mathcal{A}l \rightarrow \mathcal{A}c}) \quad (9)$$

448 i.e. after binding at the allosteric site with an energy cost  $\frac{1}{2} \mathbf{F}^{\mathcal{A}l} \cdot \mathbf{R}^{\mathcal{A}l}$ , the elastic energy of binding at  
 449 the active site is determined by (i) the force there when a ligand is already bound at the allosteric site  
 450 ( $\mathbf{F}_{|\mathcal{A}l}^{\mathcal{A}c}$  with subindex  $|\mathcal{A}l$ ); (ii) the displacement imposed at the active site  $\mathbf{R}^{\mathcal{A}c}$  to which we subtract the

451 response already caused by ligand binding at the allosteric site  $\mathbf{R}^{Al \rightarrow Ac}$ . Eq. 9 allows us to rewrite Eq.  
452 8 as

$$\mathcal{F} = \frac{1}{2} \mathbf{F}_{|Al}^{Ac} \cdot \mathbf{R}^{Al \rightarrow Ac} + \frac{1}{2} \delta \mathbf{F}^{Al \rightarrow Ac} \cdot \mathbf{R}^{Ac} \quad (10)$$

453 where one has  $\mathbf{F}^{Ac} - \mathbf{F}_{|Al}^{Ac} = \delta \mathbf{F}^{Al \rightarrow Ac}$ . If we express  $\delta \mathbf{F}^{Al \rightarrow Ac}$  and  $\mathbf{R}^{Al \rightarrow Ac}$  in terms of the imposed  
454 displacements by using Eq. 6 and if we assume weak elastic coupling between allosteric and active site,  
455 we find that each term in Eq. 10 scales in the same way as

$$\frac{1}{2} \mathbf{F}_{|Al}^{Ac} \cdot \mathbf{R}^{Al \rightarrow Ac} \approx \frac{1}{2} \delta \mathbf{F}^{Al \rightarrow Ac} \cdot \mathbf{R}^{Ac} \approx \frac{1}{2} (\mathbf{R}^{Ac})^T \cdot (\mathcal{M}^{Ac,b}) (\mathcal{M}^{b,b})^{-1} (\mathcal{M}^{b,Al}) \cdot \mathbf{R}^{Al} \quad (11)$$

456 Hence, by using that  $\frac{1}{2} \delta \mathbf{F}^{Al \rightarrow Ac} \cdot \mathbf{R}^{Ac} \approx \frac{1}{2} \mathbf{F}_{|Al}^{Ac} \cdot \mathbf{R}^{Al \rightarrow Ac}$ , we obtain from Eq. 10

$$\mathcal{F} \approx \mathbf{F}^{Ac} \cdot \mathbf{R}^{Al \rightarrow Ac} \quad (12)$$

457 since  $\mathbf{F}_{|Al}^{Ac}$  can be approximated by  $\mathbf{F}^{Ac}$  in the weak coupling limit.

458 If we denote by  $\mathbf{F}_i^{Ac}$  and  $\mathbf{R}_i^{Al \rightarrow Ac}$  forces and displacements after a mutation at link  $i$ , the cost of  
459 one mutation can be expressed approximatively (see Fig. S3B) as  $\Delta \mathcal{F}_i \approx \Delta (\mathbf{F}^{Ac} \cdot \mathbf{R}^{Al \rightarrow Ac})_i$ , where  
460  $\Delta (\mathbf{F}^{Ac} \cdot \mathbf{R}^{Al \rightarrow Ac})_i = \mathbf{F}^{Ac} \cdot \mathbf{R}^{Al \rightarrow Ac} - \mathbf{F}_i^{Ac} \cdot \mathbf{R}_i^{Al \rightarrow Ac}$ . This can be further rewritten as

$$\Delta (\mathbf{F}^{Ac} \cdot \mathbf{R}^{Al \rightarrow Ac})_i \approx -(\mathbf{F}^{Ac} \cdot \delta \mathbf{R}_i^{Al \rightarrow Ac} + \delta \mathbf{F}_i^{Ac} \cdot \mathbf{R}^{Al \rightarrow Ac} + \delta \mathbf{F}_i^{Ac} \cdot \delta \mathbf{R}_i^{Al \rightarrow Ac}) \quad (13)$$

461 having defined changes in force as  $\delta \mathbf{F}_i^{Ac} = \mathbf{F}_i^{Ac} - \mathbf{F}^{Ac}$  in analogy to changes in displacement  $\delta \mathbf{R}_i^{Al \rightarrow Ac}$   
462 introduced in the main text. We find numerically that the cost of single mutations, when it is not too  
463 small, is dominated by the changes in displacement at the active site

$$\Delta \mathcal{F}_i \approx -\mathbf{F}^{Ac} \cdot \delta \mathbf{R}_i^{Al \rightarrow Ac} \quad (14)$$

464 as shown in Fig. S3C. As a consequence, epistasis between mutations at  $i$  and  $j$  with significant magnitude  
465 can be written  $\Delta \Delta \mathcal{F}_{ij} \approx -\mathbf{F}^{Ac} \cdot (\delta \mathbf{R}_{ij}^{Al \rightarrow Ac} - \delta \mathbf{R}_i^{Al \rightarrow Ac} - \delta \mathbf{R}_j^{Al \rightarrow Ac})$ , as presented in the main text.  
466 Displacement vectors and their changes upon high-cost mutations at the active site are schematically  
467 depicted in Fig. S3A.

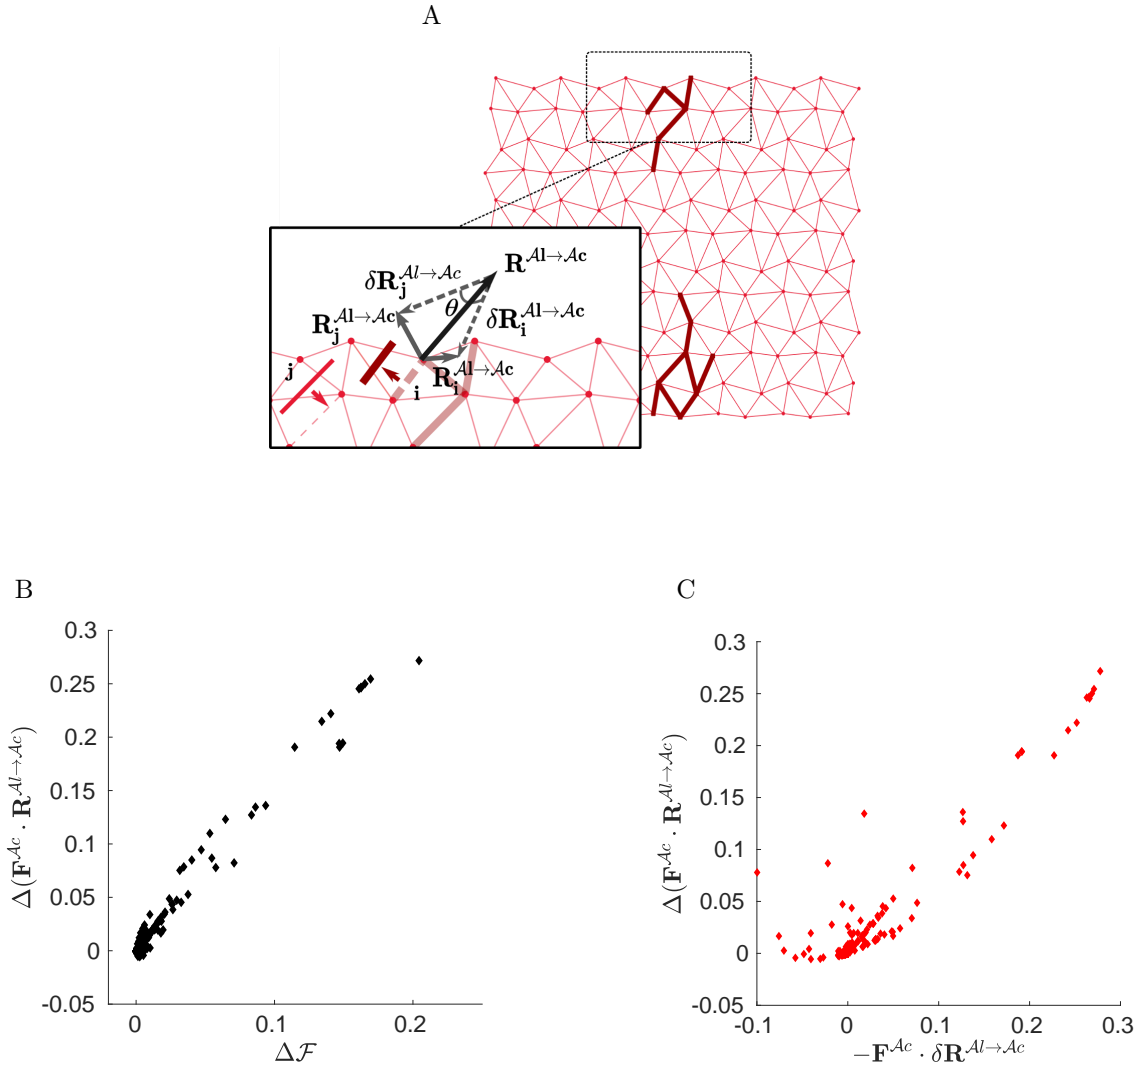

Figure S3: **Mechanics of mutations.** A: The geometry of mutation costs is illustrated in the zoom on the active site region (note that for simplicity of visualization we consider only one of the  $n_0 = 4$  nodes). Thick, dark red lines highlight links whose disruption would be lethal for the allosteric fitness. These few links, crucial to the long-distance propagation of the allosteric response, are located around active and allosteric site and exhibit maximal epistasis along with maximal single mutation costs (i.e. they populate the saturation region of Fig. 2A in the main text). After a lethal mutation consisting in removing a spring at link  $i$ , the displacement at the active site  $\mathbf{R}_i^{Al \rightarrow Ac}$  is significantly reduced with respect to the original optimal displacement  $\mathbf{R}^{Al \rightarrow Ac}$  and their difference is given by  $\delta \mathbf{R}_i^{Al \rightarrow Ac}$  (dashed arrow). When a second lethal mutation at  $j$  occurs, we denote by  $\theta$  the angle between  $\delta \mathbf{R}_i^{Al \rightarrow Ac}$  and  $\delta \mathbf{R}_j^{Al \rightarrow Ac}$ ; for lethal mutations  $\cos(\theta) \approx 1$  (see Fig. 2B in the main text), i.e. they all tend to have a homogeneous direction of action which is precisely the one opposite to the displacement at the active site. B: Numerical test of the approximation  $\Delta \mathcal{F}_i \approx \Delta(\mathbf{F}^{Ac} \cdot \mathbf{R}^{Al \rightarrow Ac})_i$  and of  $\Delta(\mathbf{F}^{Ac} \cdot \mathbf{R}^{Al \rightarrow Ac})_i \approx -\mathbf{F}^{Ac} \cdot \delta \mathbf{R}_i^{Al \rightarrow Ac}$  (C). The latter is valid only for medium-high mutation costs.



## 468 2 Prediction of epistasis

469 The scaling of epistasis (Eq. 2 in the main text) suggests a measure simply based on the inferred single  
 470 mutation costs, i.e.  $|\Delta\Delta\mathcal{F}_{ij}| \propto \min(\Delta\mathcal{E}_i, \Delta\mathcal{E}_j)$ . We have verified that this improves extremely the  
 471 prediction of long-range epistasis in our model for allostery, both for single configurations and for the  
 472 average epistatic pattern, as shown in respectively in Fig. S4B and C. The measure of epistasis via top  
 473  $|J_{ij}|$  requires the inferred model to be performant at capturing local information via local parameters;  
 474 on the other hand, the estimation of single mutation costs incorporates all the local parameters inferred  
 475 from the statistics. These results support the view that more functional information (related to non-local  
 476 modes) is embedded in weaker couplings which would be excluded by applying the contact-prediction  
 477 criterion of looking at the largest ones (usually as many as the system size): for example recently [2]  
 478 has found that the prediction of functional cooperativity between distant sites could be improved by  
 479 considering several “non-contacting” DCA couplings.

### 480 2.1 Simple model illustrating the failure of DCA

481 To explain the discrepancy between short-range and long-range DCA-predictions of epistasis, we resort  
 482 to the simple model of Fig. 6 (main text). We assign to all the 49 functional configurations the same  
 483 fitness  $\mathcal{F}$ , all the other  $2^8 - 49$  configurations would not belong to the sample of optimal configurations  
 484 and are taken with zero fitness, thus  $\Delta\mathcal{F} = 0$  if a mutation (single or double) results in a configuration  
 485 still belonging to the optimal sample and  $\Delta\mathcal{F} = \mathcal{F}$  otherwise. We can estimate average mutation costs by  
 486 counting how frequently mutations would lead to a configuration outside of the optimal sample, yielding

$$487 \Delta\Delta\mathcal{F}_{12} = \Delta\mathcal{F}_{12} - \Delta\mathcal{F}_1 - \Delta\mathcal{F}_2 = 21/49\mathcal{F} - 21/49\mathcal{F} - 21/49\mathcal{F} = -21/49\mathcal{F} \quad (15)$$

$$488 \Delta\Delta\mathcal{F}_{15} = 33/49\mathcal{F} - 21/49\mathcal{F} - 21/49\mathcal{F} = -9/49\mathcal{F} \quad (16)$$

$$489 \frac{|\Delta\Delta\mathcal{F}_{12}|}{|\Delta\Delta\mathcal{F}_{15}|} = 21/9 \approx 2.3 \quad (17)$$

490 Next, by a simple likelihood maximization we infer the set of  $J_{ij}$  and  $h_i$  compatible with  $\langle\sigma_i\rangle$  and  $\langle\sigma_i\sigma_j\rangle$ ,  
 491 single-site and pairwise frequencies of the optimal sample. We estimate  $J_{12} = 1.18$  and  $J_{15} = 0.40$ , thus  
 492 the prediction by DCA

$$493 \frac{|\Delta\Delta\mathcal{E}_{12}|}{|\Delta\Delta\mathcal{E}_{15}|} = \frac{|J_{12}(2\langle\sigma_1\rangle + 2\langle\sigma_2\rangle - 4\langle\sigma_1\sigma_2\rangle - 1)|}{|J_{15}(2\langle\sigma_1\rangle + 2\langle\sigma_5\rangle - 4\langle\sigma_1\sigma_5\rangle - 1)|} = \frac{|J_{12}(-21/49)|}{|J_{15}(-9/49)|} \approx 6.9 \quad (18)$$

494 i.e. the DCA prediction is significantly biased towards short-range epistasis. Due to symmetry of our  
 495 model, epistasis and the DCA-prediction for any combination of units in the two subparts is the same  
 496 as for units 1 and 5; similarly, the result for 2 units within the same group is given by the values for  
 497 units 1 and 2. For the remaining combinations of units, i.e. the ones belonging the same subpart but to  
 498 different groups (e.g.  $i = 1$  and  $j = 3$ ) we obtain that epistasis is weaker compared to units within the  
 499 same group

$$500 \frac{|\Delta\Delta\mathcal{F}_{12}|}{|\Delta\Delta\mathcal{F}_{13}|} = \frac{|-21/49\mathcal{F}|}{|-7/49\mathcal{F}|} = 3 \quad (19)$$

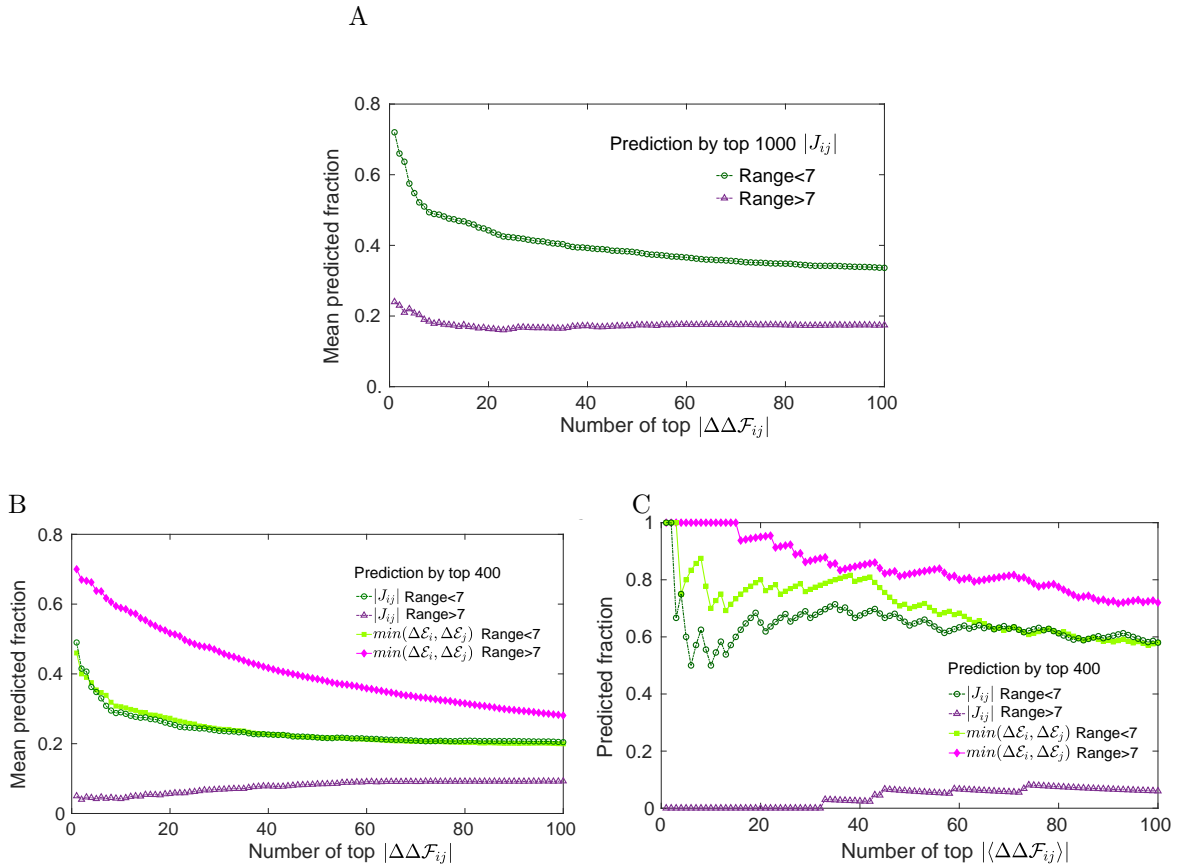

Figure S4: **Prediction of epistasis by the DCA-inferred model.** A: Same plot as in Fig. 5B (main text) where we show the fraction of top rank epistasis  $|\Delta\Delta\mathcal{F}_{ij}|$  predicted by top 1000  $|J_{ij}|$ , averaged over 100 configurations. In comparison to Fig. 5B, here we consider a higher number of the largest in magnitude couplings to predict epistasis: the mean predicted fraction increases both for short range and long range epistasis, yet a clear difference between their values remains. B: Same plot as Fig. 5B (main text) where we added curves for the prediction by  $\min(\Delta\mathcal{E}_i, \Delta\mathcal{E}_j)$  - the minimum between average single mutation costs at  $i$  and  $j$  - as implied by scaling 2 in the main text. As in Fig. 5B, we rank separately long-range ( $> 7$ ) and short-range ( $< 7$ ) pairs of links  $i$  and  $j$  in terms of  $|\Delta\Delta\mathcal{F}_{ij}|$  and we plot the fraction of these pairs - averaged over 100 configurations randomly chosen - falling either into the top 400  $|J_{ij}|$  (empty symbols) or into the top 400 values of  $\min(\Delta\mathcal{E}_i, \Delta\mathcal{E}_j)$  (filled symbols). This second measure improves only slightly the estimation of strong short-range epistasis but it does so dramatically for long-range one. C: Same plot as B where we show the fraction of the average epistasis  $\langle\Delta\Delta\mathcal{F}_{ij}\rangle$  (estimated from  $1.5 \times 10^3$  randomly chosen configurations of the MSA) that one would predict either via  $|J_{ij}|$  or  $\min(\Delta\mathcal{E}_i, \Delta\mathcal{E}_j)$ . The prediction at short distance is rather accurate, with the predicted fraction reaching 1 for the maximally epistatic pairs; at long distance, signal on long-range epistasis captured by  $|J_{ij}|$  is almost absent while the prediction by  $\min(\Delta\mathcal{E}_i, \Delta\mathcal{E}_j)$  stands out for its precision.

498 Since each subpart can be of different type (OR gate), units from different groups (i.e. types) are less  
499 tightly constrained by function. The DCA-prediction does not underestimate epistasis as for units of  
500 different subparts (i.e. at long distance) with

$$\frac{|\Delta\Delta\mathcal{E}_{12}|}{|\Delta\Delta\mathcal{E}_{13}|} = \frac{|J_{12}(-21/49)|}{|J_{13}(-7/49)|} \approx 3.5 \quad (20)$$

501 where  $J_{13} = -1.01$ . From Eq. 17, Eq. 18, Eq. 19 and Eq. 20 it is straightforward to calculate  
502  $|\Delta\Delta\mathcal{E}_{13}|/|\Delta\Delta\mathcal{E}_{12}| \times |\Delta\Delta\mathcal{F}_{12}|/|\Delta\Delta\mathcal{F}_{13}| \approx 0.86$  and  $|\Delta\Delta\mathcal{E}_{15}|/|\Delta\Delta\mathcal{E}_{12}| \times |\Delta\Delta\mathcal{F}_{12}|/|\Delta\Delta\mathcal{F}_{15}| \approx 0.33$ .

### 503 2.1.1 Feedforward neural network

504 To understand which machine learning tools could improve the prediction of epistasis in the simple  
505 model, we have built a feedforward neural network performing least squares regression of sequence data  
506 based on their fitness (see Fig. S5). For data in the training set, we provide the network with both  
507 the input sequence and the target answer, i.e. a label 1 (standing for fitness  $\mathcal{F}$ ) or 0. We vary the size  
508 of the training set from 50% to 80% of the  $2^8 = 256$  total sequences and we keep 20% of the sample  
509 for validation of the accuracy of prediction. We learn the weights, i.e. the connections between layers,  
510 which minimize the mean squared error between the output of the network and the target answers by  
511 stochastic gradient descent from a random orthogonal initialization; only relatively few trainings (about  
512 1 in 10) find a high quality solution. We obtain that the mean squared error between true and estimated  
513 fitness, averaged over 100 of such high-quality trainings, ranges between  $\sim 2 \times 10^{-6}$  for a training set  
514 with 50% of the sample to  $\sim 2 \times 10^{-7}$  with 80%. Therefore, when the network is presented with an  
515 optimal sequence mutated at some position, the network can predict the value of its fitness with extreme  
516 accuracy in such a way as to predict  $\Delta\mathcal{F} \sim 0$  when it still belongs to the optimal sample or  $\Delta\mathcal{F} \sim 1$  if  
517 it does not. This ensures that also epistasis would be accurately predicted at any range.

## 518 References

- 519 1. Cocco S, Monasson R. Adaptive cluster expansion for the inverse Ising problem: convergence,  
520 algorithm and tests. J Stat Phys. 2012;147:252–314.
- 521 2. Salinas VH, Ranganathan R. Coevolution-based inference of amino acid interactions underlying  
522 protein function. eLife. 2018;7:e34300.

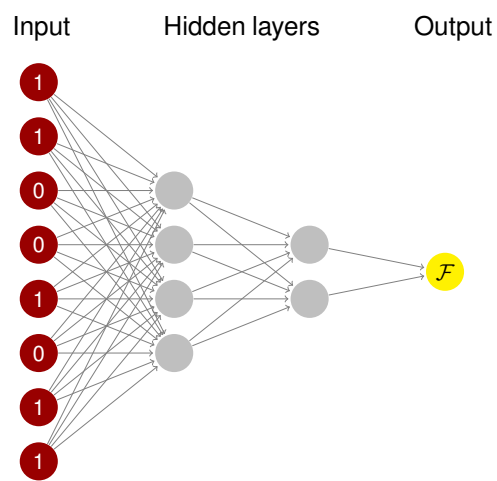

Figure S5: **Graphical representation of the feedforward neural network for regression in the simple model.** The size of the input layer is 8, as the size of the system. We add two hidden layers of 4 and 2 units and the final one-unit output is 1 if the input sequence has fitness  $\mathcal{F}$  and 0 otherwise. The activation function from one layer to the successive one is a sigmoid and the weights are dense (all units in one layer are connected to all units of the successive one).
